# Supplementary material
Source: publisher site journal article supplement (https://www.spandidos-publications.com/4495/downloadSupplementary)
Supplement: Supplementary file 1 [file downloadSupplementary]

## Sheet: Sheet 1
Table SIII. Venn diagrams of HNSCC and ferroptosis markers.
Only HNSCC	Only ferroptosis	Only validate	HNSCC AND ferroptosis NOT validate	HNSCC AND validate NOT ferroptosis	ferroptosis AND validate NOT HNSCC	HNSCC AND ferroptosis AND validate
MAL	NOS2	CHAC1	MT3		PTGS2	FTH1
CRISP3	NCF2		DUSP1		SLC40A1	TFRC
ARG1	UBC		TSC22D3		GPX4	TF
TSIX|XIST	ALB		SLC2A1		HSPB1
MS4A1	SRXN1		RGS4		NFE2L2
CLDN10	BNIP3		VEGFA
TCL1A	OXSR1		GPX2
AGR3	SELENOS		ALOX12
EREG	ANGPTL7		DDIT4
ANXA9	SLC7A11		MMP13
ANXA9|FAM63A	LOC284561
CR2	DDIT3
CD22	SESN2
CAPN6	SLC1A4
C9orf61	TXNIP
SERPINB11	VLDLR
SERPINB2	GPT2
Gcom1	PSAT1
IL1A	LURAP1L
GREM2	SLC7A5
MAMDC2	HERPUD1
CYP3A5	XBP1
SLC27A6	ATF3
ATP6V0A4	SLC3A2
CYP3A7	CBS
CGNL1	ATF4
HSPB8	ZNF419
ART4	KLHL24
FCRL4	TRIB3
FCRLA	ZFP69B
CRISP3|CRISP2	ATP6V1G2
SERPINA9	GDF15
PEG3	TUBE1
IL1F6	ARRDC3
ANGPTL1	SNORA16A
CD19	BLOC1S5-TXNDC5
CD1C	LOC390705
LOC283663	EIF2S1
IGFBP6	KIM-1
P2RX5	IL6
IL23A	CXCL2
C9orf58	RELA
C7	HSD17B11
CYP3A4	AGPAT3
FAM48B1	SETD1B
AADAC	HMOX1
BACH2	FTL
FAM129C	RPL8
14	ATP5MC3
GDPD3	MAFG
ALDH1A3	IL33
ZBED2	HAMP
ECM1	STEAP3
CRIP2	DRD4
CAMK2N1	MAP3K5
EPGN	MAPK14
CRYM	SLC2A3
FLG|LOC730833	SLC2A6
IL18	SLC2A12
CAPN14	GLUT13
AICDA	SLC2A14
HPGD	EIF2AK4
CRCT1	ALOX5
SLURP1	ALOX15
FNDC4	ACSF2
RNASE7	IREB2
OLFML1	HMGB1
CD79B	ELAVL1
ATP1A2	TFAP2C
SH3TC2	SP1
NRG2	HBA1
VIT	PLIN4
ZBTB10	HIC1
CEACAM1	STMN1
GDF10	CAPG
FCRL1	HNF4A
MYOC	NGB
PPP1R3C	YWHAE
KRT23	AURKA
BANK1	MIR4715
ARMC2	RIPK1
KLK11	PRDX1
SH3BGRL2	MIR30B
KRT77	LRRFIP1
RUNDC2B|RUNDC2C|RUNDC2A
FMO9P
ATP12A
PRKACB
LOC727738|AREG
SRPX
SPIB
LMO7
FOLR3
FUT7
TRPM6
C4orf19
TCP11L2
SLC7A10
CYP21A2|TNXB
6
ST14
TREML2
BLNK
FGFBP1
IRF8
SPRR3
KEL
KLHL14
KBTBD8
MYBPC1
HIST1H2BG
BLR1|BCL9L
BLK
CEACAM7
PDZD2
CYP11A1
LOC147645
RAC2
XAGE1B|XAGE1C|XAGE1|XAGE1E|XAGE1D
ABAT
MPZL3
PRSS2
AHNAK
INPP5D
SHROOM3
SYNPO2L
FAM46B
CD24
DUSP5
LPIN1
KRT4
LOC732445|CHRFAM7A|CHRNA7
BCAS1
CORO1A
KRT80
PHLDA1
SYT8
DTX1
BFSP2
ARHGDIB
LCP1
CRIP1
TPPP3
PLP1
HSPC159
LOC643008
TMEM40
BTK
PCDH9
FAM107A
ZXDA|ZXDB
CD37
MEF2B
CLIC3
LOC284232
AQP5
ARC
MYO1A
C13orf18
20
PRKCB1
BPGM
TJP1
CRNN
ZDHHC13
LCE2C
CX3CR1
CD79A
THADA
ROR1
STK39
UPK1A
SMTNL1
LMO2
OGN
STXBP6
GPR110
F3
UGT2B7
CCNG2
ZDHHC19
ADAMTS19
IKZF1
SMPD3
P2RX2
GNG4
C15orf48
GABRP
C3orf41|LOC732115
ZSCAN18
NKX6-2
YOD1
GPR64
DHRS9
KLHL6
CLEC3B
PDE6B
SLC5A5
IQCD
MGLL
KRTAP19-1
NCF4
FLJ45244
LOC728371
ACCN1
GDA
CPA4
SLC24A3
IFT57
UBXD3
FA2H
ABLIM3
SOX8
GPR114
CAST|ARTS-1
LCE3D
NEIL1
LPXN
S100P
LL0XNC01-237H1.1|RAB40A
C3orf30
MBOAT2
LYPD2
FREM1
RFTN1
CALB2
UPP1
UPK3B
RCSD1
ZNF229
TTYH1
2
OR52N5
PTK6
VPREB3
SERPINB7
PHF23
ADRB2
AR
AGER
LOC647121|EMB
SLC6A4
RHOD
SSX5
MXD1
GABRA3
MYBL1
ZNF682
HMGCS1
UBL3
SSX6|SSX4|SSX5|SSX4B
GCKR
CLU
TGFA
FCRL3
COBL
RAB37
NCR3
NUAK2
PSORS1C2
EPS8L1
CD1A
SCEL
COTL1
BCAS4
GALNT12
CORO1B
NLRP2
LOC92017
TAC4
C13orf21
CDH12
TOX
PALMD
LY86
SLC16A2
CR1L
PKIB
NUCB2
LRFN5
KIRREL2
PTGIS
MNT
SLC35F3
PLK3|RP11-269F19.9
ZNF365
BTNL9
DOCK3
HPCAL4
SPIC
GALNTL1
ANKRD20A2|ANKRD20A4|ANKRD20A1|ANKRD20A3|ANKRD20B|LOC653436
LIFR
VPS25
CUGBP2
TMOD3
C6orf105
MBD2
LOC646934
SERTAD2
USP6NL
TRAPPC1
PRICKLE4
ZNF185
NAPSA
CAB39L
VSIG2
ANKRD20A2|ANKRD20A4|ANKRD20A1|ANKRD20A3|LOC653436
VPS4B
CDO1
EHD3
CEACAM5
SLC13A4
CIDEA|LOC649728
RND3
CD300LG
CACHD1
IL2RG
FLJ11151
OR5M8
PRSS27
SORBS2
ELL3
NDRG2
DAPP1
SPAG9
C1orf165
RGS9
MUC20
A2ML1
KCNK15
PCAF
UPK1B
SCARA5
OR2A7|OR2A4
PDCD1
DMRTC1|LOC728656
ST3GAL4
P2RY12
DGAT2
LCE2A
INPP5A
BAHCC1
RP11-93B14.6
STX7
LAPTM5
EPHA10
PNKD
ELOVL1
ALDH2
HTR3A
CEACAM1|CEACAM3
SCGB1A1
HLA-DOB
PAQR8
GPR111
MS4A5
ENPP2
BCL2A1
PDLIM3
PIK3CG
CDC14A
KRT13
LOC152573
TSPAN32
NLRC3
POU2F2
TMEM156
SELL
CD1D
CLIC6
ECHDC3
ISL1
KLK8
ANKRD20B
ERO1L
MGC45438
ANK1
ABCA8
LRG1
HVCN1
S100A16
CD83
SPIC|LOC646120
EPS8L2
ZNF257
PRSS3
CARD11
C2orf54
LOC731624|LOC729832
RPESP
LOC647157|NHEDC1|LOC389000|LOC731909|LOC644768
SNCG
CLDN4
SSX2B|SSX3|SSX2
ZNF608
PPIL6
NDST4
IYD
HIST1H3D
TFF3
CRABP2
SH2D6
FLJ31818
DNAJC5G
TMEM154
DTNA
TP53INP2
GNA14
XG
CMTM7
NDFIP2
C1orf116
RAB11FIP1
HTR1E
ZNF404
LOC129293
GMDS
DIO1
CCDC29
ACR|LOC645529
IL1B
ANKRD15
C18orf25
PSCA
PCSK2
TUBB4
CSTB
PRR4
GCNT3
TCL1B
PIP4K2A
PSG5
SLC7A4
EBI3
AGR2
ETNK2
ANKRD24
TTC9
B3GALT5
NPAL3
FHL1
QPCT
EXPH5
HPSE
ENPP1
GSG1
AGPAT4
ANXA1
SYTL4
PI16
ZNF790
MYRIP
GCET2
SCG3
SLC32A1
PPL
TSPYL5
PSG7
TM7SF2
SLC14A2
CAMK2B
PSG6
CNGA1
FAM107B
IL1RN
PIM1
GADD45B
ADRA1B
BLZF1
RIOK3
PTPRCAP
RFK
ESRRG
RLN2
RAB33A
SH3KBP1
CFP
CCDC115
PHACTR1
SASH1
KNCN
MYEOV
PPP1R1A
VGLL1
KLHL29
SLC4A10
ACHE
NDN
PTPN20B|PTPN20A
S100B
SNX9
PCSK5
SYS1-DBNDD2|DBNDD2
JAZF1
SLC35F2
TRPM2
RABGAP1L
SYNGR1
DUX3
NKX2-8
C17orf47
C3orf14
PRRT3
CEACAM6
ACSL6
LOC554226
DNAH8
KLK5
ITGA9
CRTAC1
ACAA1
|
TUBB2B
PADI1
SLC1A2
CDKN2AIP
PAX9
SERPINB6
NHEDC1
TSPAN33
CHI3L2
PCDH8
ZNF780B
SERPINA5
MAPK8IP2
EHD1
RORB
ZNF135
MFNG
GLP2R
HDAC9
CLTB
C12orf29
SHMT1
PANX3
C1orf71
KCTD12
PSAPL1
UPRT
GLTSCR2
RAB39B
GNG8
FAM113B
MYO5B
AFF3
SGPP1
SRPX2
FLJ22655
HS3ST1
HYOU1
FAM84B
RGN
AXUD1
ERBB4
7A5
C5orf29
SSX2B|SSX7
BTN2A2
TRIM6
PCDHA1
ZFP28
PDLIM2
AMOTL2
DOCK8
LOC729264
SPAG1
CPVL
S100A14
GPR137
RIC3
GYPC
GPRC5D
MAPK13
ICAM3
GPAM
EFNA1
RUNX1
CCNE2
HMGB3
PCDHB16
FNBP1L
IFNE1
DPY19L4
RHOBTB1
HOXB7
TSPAN15
TGFBI
FANCM
POLQ
LOC728862
C6orf150
ENAH
PROCR
NES
KCNMA1
PPM2C
C20orf23
TGFB3
WDR5B
CSPG4
RCN3
PLCE1
HIATL1
PTGFRN
CLEC4D
ADCY3|CENPO
PIP4K2B
TRIM13
UGCGL2
IGF1R
IRX3
TTC29
RFC4
SENP5
GAD1
TPBG
GOLM1
STOM
GSC
TCF7L2
COL6A1
CPT1C
TNFRSF18
DDX58
DST
RCN1
EPS8
MTDH
MCM4
FBXO11
SLC16A1
PDPN
FBLIM1
TNFSF10
PTPRK
RGS5
NDRG1
SYNE2
PCDH19
NAV1
CXADR|LOC440224|LOC653108|LOC730425
CTSC
HIG2
NETO2
TMEM181
ACVR1
LOC653877|UTP20
ANKRD50
GPM6B
STRN3
TBL1XR1
ChGn
MTUS1
CENTD3
TLX2
NCOA7
KAL1
IER5L
SCG5
SOX4
C5orf13
EPPK1
NAPE-PLD
HTRA3
FABP5|FABP5L7
ARL13B
NEO1
LOC728735|OVOS2|LOC731158|LOC728715
CCDC102B
ZNF8
MDS1
CRMP1
DGCR8
LRP12
GPR161
ASTN2
FAM20A
LRRC58
PHF14
HEPH
ABCC5
RAGE
GBP5
C14orf101
PARP14
ATP2C1
SH3PXD2B
FAM46A
C6orf10
TRAM2
KNTC1
NUP62CL
UBAP2L
NGFRAP1
DLX6
LOXL2
CXorf57
TMEM65
CDC42BPA
TMEFF1
VCAN
ZNF311
TGIF1
DCBLD1
PHTF1
SLC47A2
RAB15
STAT1
ADAMTS2
IQGAP3
TBC1D24
ANTXR1
PPME1
CD109
LOC727882|MXRA8
SOAT1
LRRC32
NR4A2
ECT2
ZC3H7B
LRPAP1
GNB4
FOXRED2
RSRC1
HK2
GPNMB
ITGB4
LRRCC1
TRIM45
SH3PXD2A
GLIS1
APOL1
HLTF
UBE1L2
MESP1
ARL17P1
IGSF3
SLC16A10
CSTF2T
SC65
LOC729915
GOLIM4
HBS1L
EIF2AK2
ANKRD25
IFIT2
C22orf23
CFHR4
CBR3
HERC5
CDC42BPB
FN1
NLGN4Y
PLAT
CENPF
CDH3
CDKN1C
RNF183
ASPM
GPR161|LOC730012
OAS2
USP37
PIGX
COL15A1
TCN2
ETS2
PRKY
CASK
COL1A2
ANGPT2
NUAK1
KIAA1505
LUM
C1orf167|MTHFR
PKDREJ
HOXD10
LMNB1
RIN2
CPA6
KCNE3
KIAA1199
DGKG
GALNT4
FZD6
SEC61A1
PLOD2
GRHL2
CACNA2D3
SERPINH1
CELSR3
GPR98
IFI6
CTSK
BRCA2
MAP1B
FABP5|FABP5L7|FABP5L1
FAM137A
MFAP2
XRN1
TMSL8
SOCS3
RCN1|XXyac-R12DG2.2
ABCA4
DMXL2
P4HA1
LOC730658
ATAD2
NOTCH3
PPFIA1
LOC732402|PTPLAD1
ACAN
TMEM44
FAM111B
ARRDC4
PPAPDC1A
C1orf59
TBC1D8B
ITGA6
DNMT3B
FKBP10
HTRA1
C6orf168
LAMB1
RDH10
ATP1B3
PLEKHG4
WFDC1
SOD2
GPR116
CDH11
LAMC2
HEY2
FCGR3A|FCGR3B
FOLH1
KRTAP4-10
CALCRL
ZNF469
BDNF
PLXND1
C4orf18
LPHN3
1
AQP11
F2R
IFI44L
DRAM
SESN3
TMTC1
MYO10
C9orf39
SIPA1L3
C1QTNF6
SNAI2
XPR1
ITGA1
MFI2
LRRC15
PPP2R3A
INSR
MATN3
C12orf56
FAT
XAF1
RNF32
MTAP
RTP4
GABRE
IMPA2
CNN1
NID1
TMEM22
SCHIP1
IFIT3
C3orf33
FCGR1A
TMEPAI
DLX4
C19orf57
IFI44
DIP2B
PLAC1
TREM2
RAG1
SFRP2
COL5A2
THBS2
CD93
EPHA4
APP
FARP1
COLEC11
TRPC6
SLC22A4
ZNF367
COL6A3
NRP2
SSFA2
NOS1AP
TMTC3
FAM148B
SLC16A14
SPARC
COL3A1
PXDN
COL12A1
HNT
ITGA11
COL13A1
CPE
RSAD2
IGF2BP2
TMEM16A
MDK
HOMER3
LOC340286
FLJ14213
MSX2
CXCL11
LINGO1
HOXC9
CA2
LOC645301|SOX4
INHBB
PSMAL
HOXC13
RPRM
E2F7
IL17RB
PLSCR4
FAM40B
C19orf25|APC2
ADAM12
NANOS1
OASL
BNC1
COL24A1
HIST1H1A
WNT11
GBP1
KIAA1244
ADAM23
SPINK6
CRISPLD1
FCGR3A
PCDHB2
BCL6B
ODZ4
LOC729682|KRT17
GALNTL2
STC2
PIK3R3
FSTL4
EFCAB1
MEST
ZFP64
PHLDB2
SCG2
MAGED4B|MAGED4
CD36
MYCL1
COL5A1
ACVR1C
RNF217
FLJ20035
WDR52
KCNJ8
FLJ33790
BBS5|CEP170L
P2RY6
BST2
PCDH17
LRRC4
SEMA3C
LY6K
ENPEP
GJB7
PLAU
SLCO1A2
P4HA3
IFITM3
COL7A1
LOC541473
GPR4
FOXJ1
APLN
HOXA4|LOC285943
MUCL1
IQCA
EGFL6
DNAH17
FOXD2
PPEF1
SPP1
PCDHB15|PCDHB11
GUCY1A2
NID2
COL10A1
PRR16
CHST6
CYP1B1
AKR1B10
FCGR1B|FCGR1A|FCGR1C
COL4A2
NMB
ZFYVE16
HOXA10
WNT2B
BBS5|GOSR1|LOC147804|CEP170L|ARL17P1
CTHRC1
HOXA5
IRX4
COL8A1
SMC1B
HSD17B6
MMP12
SLFN13
GLI2
TNN
SOST
EDIL3
GDPD2
UTY
ESM1
ZFY
TDO2
tcag7.1260
IL11
WNT2
CDKN2A
COL1A1
SLC10A4
SLCO1B3
PDGFRB
CYP26A1
F2RL2
GREM1
CLEC2B
LOC729960
LHX2
NEFL
SOX11
ARTN
CYP4F11
CXCR7
SULF1
LOC648517|AKR1C1
IL12RB2
STK31
LOC340888
COCH
KIF26B
LOX
MMP10
ASPN
AKR1C4|AKR1C3
ADAMTS4
PCDHB10
VTCN1
CYorf14
PCDHB9
SIX1
TNFAIP6
COL4A1
WISP1
ABCA13
LYPD1
AKR1C1
PRDM13
DDX3Y
PCDHB14
HOXD11
NOX4
ZIC1
LOC648517|AKR1C2|AKR1C1
COL11A1
AKR1C2|AKR1C1
ICEBERG
FAP
IRX5
TACSTD1
GNGT1
SIX4
HOXA7
SHOX2
SYCP2
WDR66
MMP11
CALB1
TCAM1
POSTN
HOXA9
MMP3
MMP1
TGM3
SPINK5
ACTA1
ENDOU
EMP1
HOPX
ADH7
MYL1
KLK13
MB
ALDH3A1
AQP3
MYH7
MYH2
COX7A1
STATH
TGM1
APOD
CRYAB
PTN
TTN
SERPINB1
LY6D
TMPRSS11D
CSTA
NMU
PITX1
CYP3A43///CYP3A5
KRT15
TNNC2
SPRR1A
TNNI2
TSPAN8
MALL
EXOSC7///CLEC3B
ATP2A1
LYPD3
HBB
SULT2B1
GPX3
METTL7A
SPRR2C
AIM1
MYH11
TNNC1
NEB
UGT1A3///UGT1A1///UGT1A4///UGT1A9///UGT1A5///UGT1A6///UGT1A7///UGT1A8///UGT1A10
CCL2
PIP
KRT19
DPT
BARX2
HBA2///HBA1
FOSB
LCN2
ACPP
IVL
SPARCL1
RRAD
SLPI
AZGP1
S100A9
LGALS7B///LGALS7
NEBL
SCNN1A
GPD1L
CFD
IGFBP5
RRAGD
DNASE1L3
LYZ
S100A8
CLDN7
ITM2A
MUC5B
ADIPOQ
PLAGL1
PGD
ABLIM1
ACKR1
ZFP36
NREP
COL6A2
LAMA3
DFNA5
LAMB3
MAGEA4
LPCAT1
IGF2BP3
FEZ1
PRSS23
SERPINE1
LOC101927705///P4HA2
SERPINE2
COL16A1
MAGEA10-MAGEA5///MAGEA5
LGALS1
IGFBP3
CXCL8
FSCN1
ISG15
MAGEA6///MAGEA3
FAT1
TPM1
RBP1
KRT17///JUP
MYO1B
TNC
PFN2
PTHLH
MMP9
